# Supplementary material for: Bimetal-doped cobalt oxyhydroxides/hydroxides synthesized by electrochemistry for enhanced OER activity
Source: Royal Society of Chemistry journal article supplement (doi:10.1039/d4qi00823e), 2024-01-01
Supplement: d4qi00823e1.pdf [file d4qi00823e1.pdf]

## Supplementary Information

# **Bimetal-doped cobalt oxyhydroxides/hydroxides synthesized by electrochemistry for enhanced OER activity**

Rongmei Zhu,<sup>\*a</sup> Yi Zhang,<sup>a</sup> Limei Liu,<sup>a</sup> Yong Li,<sup>a</sup> Gaihua He,<sup>b</sup> and Huan Pang<sup>\*a</sup>

School of Chemistry and Chemical Engineering, Institute for Innovative Materials and Energy,  
Yangzhou University, Yangzhou, 225009, Jiangsu, P. R. China

\*Corresponding authors: rmzhu@yzu.edu.cn (R. Zhu), huanpangchem@hotmail.com,  
panghuan@yzu.edu.cn (H. Pang)

## Table of Contents

|                                                                                                                                                                                                                             |    |
|-----------------------------------------------------------------------------------------------------------------------------------------------------------------------------------------------------------------------------|----|
| <b>Chemical reagents and materials</b> .....                                                                                                                                                                                | 4  |
| <b>Characterization</b> .....                                                                                                                                                                                               | 4  |
| <b>Electrochemical measurements</b> .....                                                                                                                                                                                   | 5  |
| <b>Electrochemical calculation</b> .....                                                                                                                                                                                    | 5  |
| <b>DFT Calculations</b> .....                                                                                                                                                                                               | 5  |
| <b>Figure S1.</b> (a)Low and (b) high magnificent SEM images of Co-MOF. ....                                                                                                                                                | 7  |
| <b>Figure S2.</b> SEM images of electrochemical Lewis acid co-etched samples with (a)5, (b)10, (c)20, (d)50, (e)100, (f)150 cycles of CV. ....                                                                              | 8  |
| <b>Figure S3.</b> (a) Experimental and simulated XRD patterns of Co-MOF; (b) XRD pattern of bare carbon paper. ....                                                                                                         | 9  |
| <b>Figure S4.</b> FT-IR patterns of CoOOH/Co(OH) <sub>2</sub> , (Hf)CoOOH/Co(OH) <sub>2</sub> , (Fe)CoOOH/Co(OH) <sub>2</sub> , and (Fe,Hf)CoOOH/Co(OH) <sub>2</sub> . ....                                                 | 10 |
| <b>Figure S5.</b> Survey XPS spectra of (Fe)CoOOH/Co(OH) <sub>2</sub> , (Hf)CoOOH/Co(OH) <sub>2</sub> , and (Fe,Hf)CoOOH/Co(OH) <sub>2</sub> .....                                                                          | 11 |
| <b>Figure S6.</b> High-resolution XPS spectra of Fe 2p in the samples of (Fe)CoOOH/Co(OH) <sub>2</sub> and (Fe,Hf)CoOOH/Co(OH) <sub>2</sub> . ....                                                                          | 12 |
| <b>Figure S7.</b> Tafel slop plot of all four catalysts at high potential. ....                                                                                                                                             | 13 |
| <b>Figure S8.</b> The optical photo of CoOOH/Co(OH) <sub>2</sub> , (Hf)CoOOH/Co(OH) <sub>2</sub> -0.75, (Hf)CoOOH/Co(OH) <sub>2</sub> -1.5, and (Hf)CoOOH/Co(OH) <sub>2</sub> -2.25 (from left to right respectively). .... | 14 |
| <b>Figure S9.</b> LSV plots of (Fe,Hf)CoOOH/Co(OH) <sub>2</sub> with different Hf <sup>4+</sup> dosages. ....                                                                                                               | 15 |
| <b>Figure S10.</b> The CV curves from -0.7 to -0.6 V vs RHE of (a)CoOOH/Co(OH) <sub>2</sub> , (b)(Hf)CoOOH/Co(OH) <sub>2</sub> , (c)(Fe)CoOOH/Co(OH) <sub>2</sub> , and (d)(Fe,Hf)CoOOH/Co(OH) <sub>2</sub> .....           | 16 |
| <b>Figure S11.</b> (a)Normalized LSV polarization curves and (b)corresponding Tafel slopes. ....                                                                                                                            | 17 |
| <b>Figure S12.</b> The differential charge densities of (Fe)CoOOH/Co(OH) <sub>2</sub> with O*...                                                                                                                            | 18 |
| <b>Figure S13.</b> PDOS plots of Co+Fe sites in (Fe,Hf)CoOOH/Co(OH) <sub>2</sub> and                                                                                                                                        |    |

|                                                                                                                                                                                         |    |
|-----------------------------------------------------------------------------------------------------------------------------------------------------------------------------------------|----|
| (Fe)CoOOH/Co(OH) <sub>2</sub> .....                                                                                                                                                     | 19 |
| <b>Figure S14.</b> The projected density of states on (a) (Fe)CoOOH/Co(OH) <sub>2</sub> and (b) (Fe,Hf)CoOOH/Co(OH) <sub>2</sub> model.....                                             | 20 |
| <b>Figure S15.</b> Spin polarizability of (Fe)CoOOH/Co(OH) <sub>2</sub> and (Fe,Hf)CoOOH/Co(OH) <sub>2</sub> (calculated with the energy interval of [ $E_f-0.2$ eV, $E_f$ ]).<br>..... | 21 |
| <b>Figure S16.</b> Gibbs free energy diagrams for (Fe)CoOOH/Co(OH) <sub>2</sub> at U=1.23 V.<br>.....                                                                                   | 22 |

## Chemical reagents and materials

Cobalt(II) nitrate hexahydrate ( $\text{Co}(\text{NO}_3)_2 \cdot 6\text{H}_2\text{O}$ , 98%), 2-methylimidazole ( $\text{C}_4\text{H}_6\text{N}_2$ , 2-MeIM, 99%), potassium hydroxide (KOH, 85%), purchased from Aladdin Reagents and used as received. Hafnium(IV) chloride ( $\text{HfCl}_4$ ,  $\geq 98\%$ ), Ammonium iron(III) sulfate ( $\text{NH}_4\text{Fe}(\text{SO}_4)_2$ ,  $\geq 98\%$ ), Carbon paper was purchased from Hesen corporation.

### Pre-treatment of carbon paper

The native carbon paper was placed in furnace and calcined at 500 °C for 4 h in atmosphere.

### Synthesis of Co-MOF

1 mmol (0.291 g) of cobalt nitrate hexahydrate were dissolved in 25 mL of deionized water and noted Solution A. 2.5 mmol (0.2052 g) of 2-methylimidazole were dissolved in 25 mL of deionized water and noted Solution B. The carbon paper was placed in solution A and soaked with stirring for 2 h. Then solution B was poured into solution A, and mixed solution and carbon paper were transferred to the liner of the PTFE reactor. The reactor was sealed and transferred to an oven at 160 °C for 8 h. The carbon paper was washed with methanol after reaction. Finally, the Co-MOF-loaded carbon paper was dried in an oven at 60 °C overnight.

### Synthesis of (Hf)CoOOH/Co(OH)<sub>2</sub>

Certain amount of  $\text{HfCl}_4$  was added to a solution of 0.1 M KOH. Then carbon paper loaded with Co-MOF was placed in the mixed solution. Electrochemical cyclic voltammetry was used for the etching at this condition. The voltage range was set to 0-0.6 V (vs Hg/HgO) with a sweep rate of 10 mV s<sup>-1</sup>. Then, the carbon paper was collected after a certain number of cycles until the Co-MOF was gradually transformed into green, and washed with deionized water.

### Synthesis of (Fe,Hf)CoOOH/Co(OH)<sub>2</sub>

Carbon paper loaded with (Hf)CoOOH/Co(OH)<sub>2</sub> was placed in an aqueous solution of 0.15 M ammonium iron sulfate. Electrosorption  $\text{Fe}^{3+}$  for 1150 s at a current density of 1 mA cm<sup>-2</sup> using chronopotentiometry. The high potential limit of chronopotentiometry is need to set an unreachable value, which was 4 V in this experiment.

### Synthesis of CoOOH/Co(OH)<sub>2</sub>

Synthesize procedure is consistent with (Hf)CoOOH/Co(OH)<sub>2</sub>, but do not add  $\text{HfCl}_4$  to the KOH solution.

### Synthesis of (Fe)CoOOH/Co(OH)<sub>2</sub>

Synthesize procedure is same as (Hf)CoOOH/Co(OH)<sub>2</sub>, but do not add  $\text{HfCl}_4$  to the KOH solution. The process of electrosorption of  $\text{Fe}^{3+}$  is consistent with the conversion of (Hf)CoOOH/Co(OH)<sub>2</sub> to (Fe,Hf)CoOOH/Co(OH)<sub>2</sub> except using carbon paper loaded with CoOOH/Co(OH)<sub>2</sub>.

## Characterization

Scanning electron microscopy (SEM) images were obtained on a Zeiss Supra55 microscope. The samples were tested by X-ray diffraction (XRD) on a Rigaku-Ultima III with Cu K $\alpha$  radiation ( $\lambda = 1.5418 \text{ \AA}$ ) for the phase analysis. High-resolution transmission electron microscopy (HRTEM) images and SAED images were captured on a Tecnai G2 F30 transmission electron microscopy at an acceleration voltage of 300 kV. X-ray photoelectron spectroscopy (XPS) analysis was carried out using a Thermo Scientific ESCALAB 250Xi X-ray photoelectron spectrometer.

## Electrochemical measurements

All the electrochemical measurements were carried out in a three-electrode system via a CHI-760E (Shanghai Chenhua) instrument at room temperature. A Carbon paper loaded with catalyst was employed as the working electrode, graphite carbon rod as counter electrode, and Hg/HgO electrode as reference electrode in 1.0 M KOH electrolyte. Linear sweep voltammetry curves were measured at a sweep rate of 5 mV s<sup>-1</sup>. The sample loading is 0.35 mg/cm<sup>2</sup>. The measured potentials of all the data were converted to RHE scale according to the Nernst equation ( $E_{\text{RHE}} = E_{\text{Hg/HgO}} + 0.059 \times \text{pH} + 0.098$ ) scale.

## Electrochemical calculation

Through adjusting to the Tafel equation ( $\eta = b \log j + a$ , where  $\eta$  is the overpotential,  $b$  is the Tafel slope,  $j$  is the current density and  $a$  is the exchange current density), the Tafel slopes and exchange current densities could be calculated for prepared materials.

## DFT Calculations

The density functional theory (DFT) calculations were implemented by the Vienna Ab initio Simulation Package (VASP). The ion-electron interaction was described according to the projector augmented wave (PAW). The exchange–correlation functional was adopted in the generalized gradient approximation (GGA) using Perdew-Burke-Ernzerhof (PBE) method. The kinetic cutoff energy was chosen at 400 eV, and the changes in total energies and the atomic force were set to be 10<sup>-4</sup> eV and 0.02 eV/Å, respectively. For the structure optimizations, a 2×2×1 Monkhorst–Pack (MP) kpoint grid was utilized.

The difference in the number of electrons with opposite spin directions on the Fermi surface was calculated through spin polarization analysis. The specific rules are as follows:

$$\text{Spin polarization} = \left| \frac{e_{\uparrow} - e_{\downarrow}}{e_{\uparrow} + e_{\downarrow}} \right|$$

where  $e_{\uparrow}$  and  $e_{\downarrow}$  represent the charge density of spin-up and spin-down electrons, respectively, in the real space with an energy interval of  $[e, E_f]$ . In this work, the energy range of  $[E_f - 0.2 \text{ eV}, E_f]$  was used. To estimate the OER catalytic activities of (Fe)CoOOH/Co(OH)<sub>2</sub> and (Fe,Hf)CoOOH/Co(OH)<sub>2</sub>, we computed the Gibbs free energy ( $\Delta G$ ) of each reaction step in OER. On the basis of this model, the  $\Delta G$  of each elementary step can be determined by:

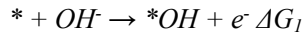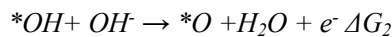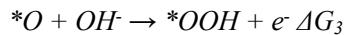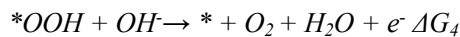

$\Delta G = \Delta E + \Delta \text{ZPE} - T \Delta S$ , where  $\Delta E$  can be directly determined from DFT computations.  $\Delta \text{ZPE}$  refers to the change in zero-point energy, while  $\Delta S$  denotes the energy difference of entropy, and  $T$  is the room temperature (298.15 K). Notably, the ZPE and  $S$  of oxygenated intermediates

in OER were obtained by computing their vibrational frequencies, while those of free H<sub>2</sub> and H<sub>2</sub>O molecules were obtained from the NIST database. The potential of (H<sup>+</sup>+ e<sup>-</sup>) in solution at standard conditions was assumed as the potential of 1/2 H<sub>2</sub>. The Gibbs free energy of O<sub>2</sub>(G<sub>O2</sub>) was determined according to the following equation:  $G_{O_2} = G_{H_2O} - 2G_{H_2} + 4.92\text{eV}$ . After obtaining the  $\Delta G$  values of each elementary step in OER, the limiting potential (U<sub>L</sub>) can be obtained:  $U_L = \max(\Delta G_1, \Delta G_2, \Delta G_3, \Delta G_4)/e$ , which has been widely-accepted as the descriptor for thermodynamically evaluating the catalytic performance of OER on a given electrocatalyst.

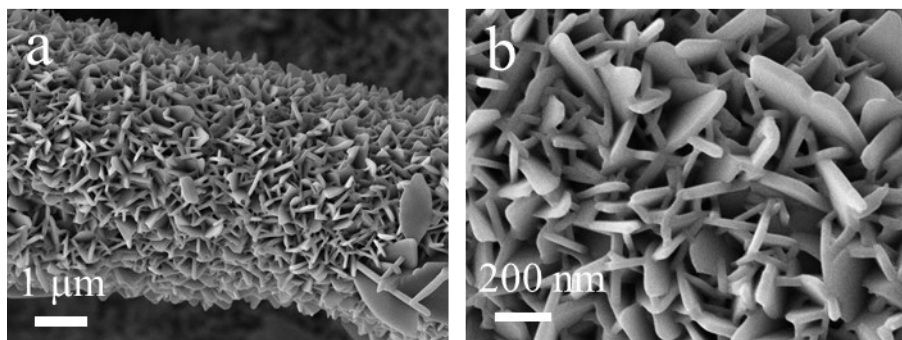

**Figure S1.** (a) Low and (b) high magnification SEM images of Co-MOF.

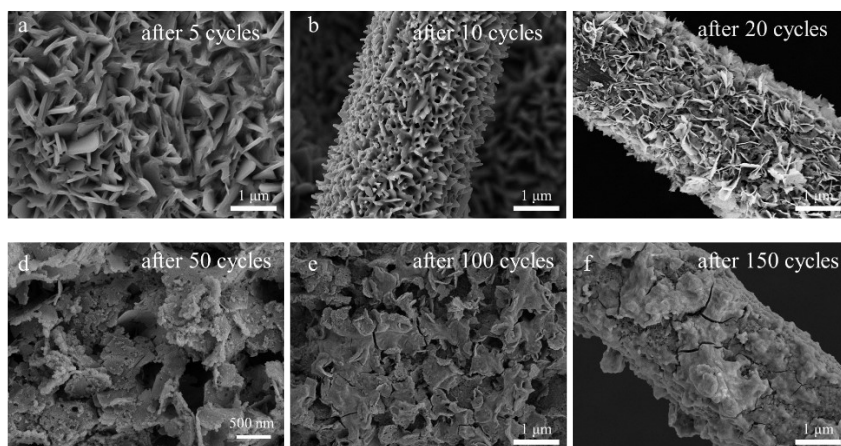

**Figure S2.** SEM images of electrochemical Lewis acid co-etched samples with (a)5, (b)10, (c)20, (d)50, (e)100, (f)150 cycles of CV.



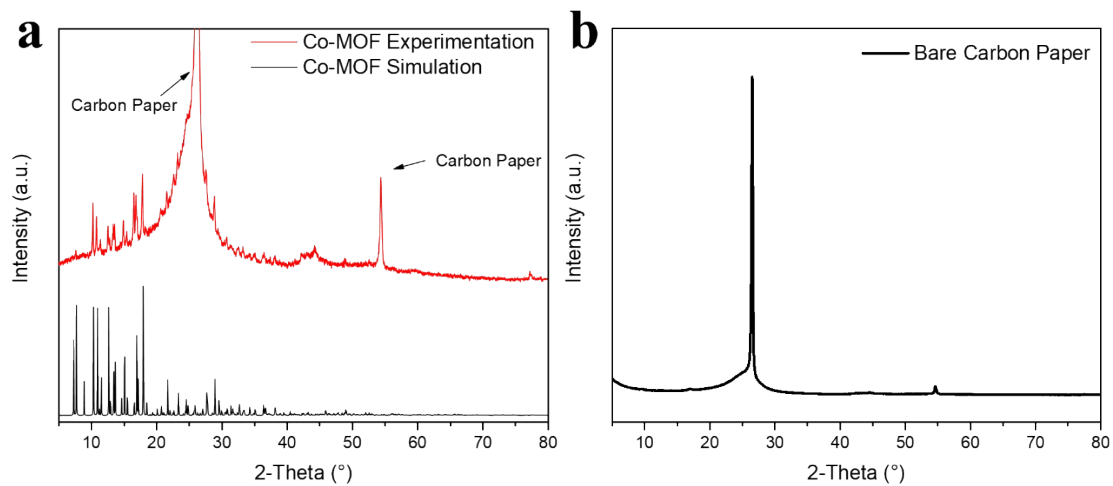

**Figure S3.** (a) Experimental and simulated XRD patterns of Co-MOF; (b) XRD pattern of bare carbon paper.

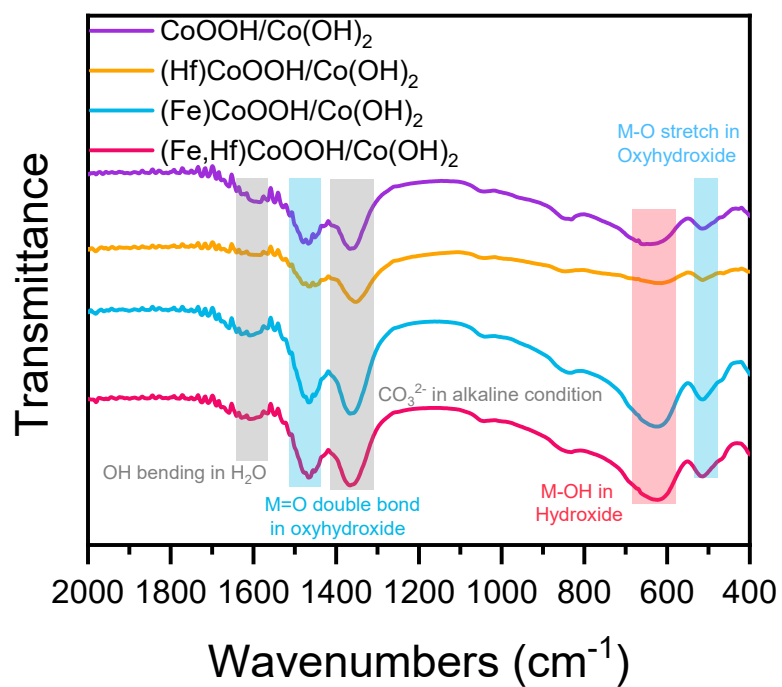

**Figure S4.** FT-IR patterns of CoOOH/Co(OH)<sub>2</sub>, (Hf)CoOOH/Co(OH)<sub>2</sub>, (Fe)CoOOH/Co(OH)<sub>2</sub>, and (Fe,Hf)CoOOH/Co(OH)<sub>2</sub>.

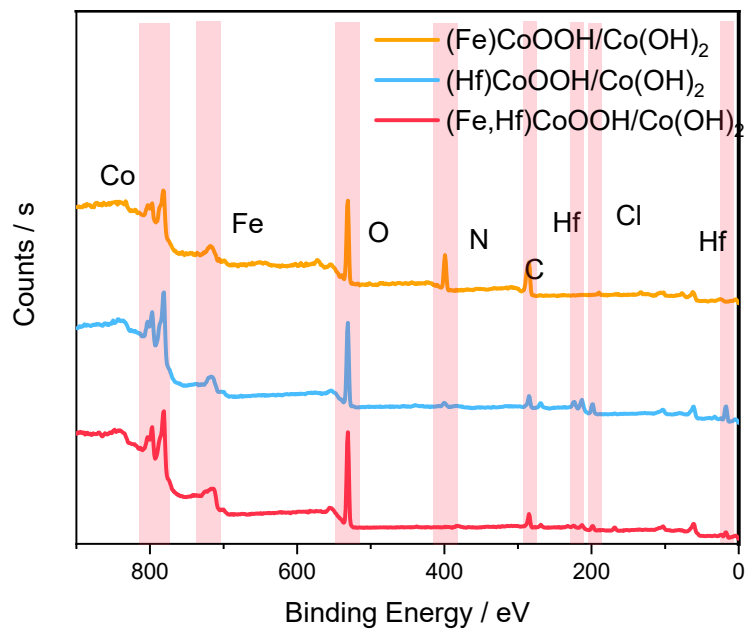

**Figure S5.** Survey XPS spectra of (Fe)CoOOH/Co(OH)<sub>2</sub>, (Hf)CoOOH/Co(OH)<sub>2</sub>, and (Fe,Hf)CoOOH/Co(OH)<sub>2</sub>.

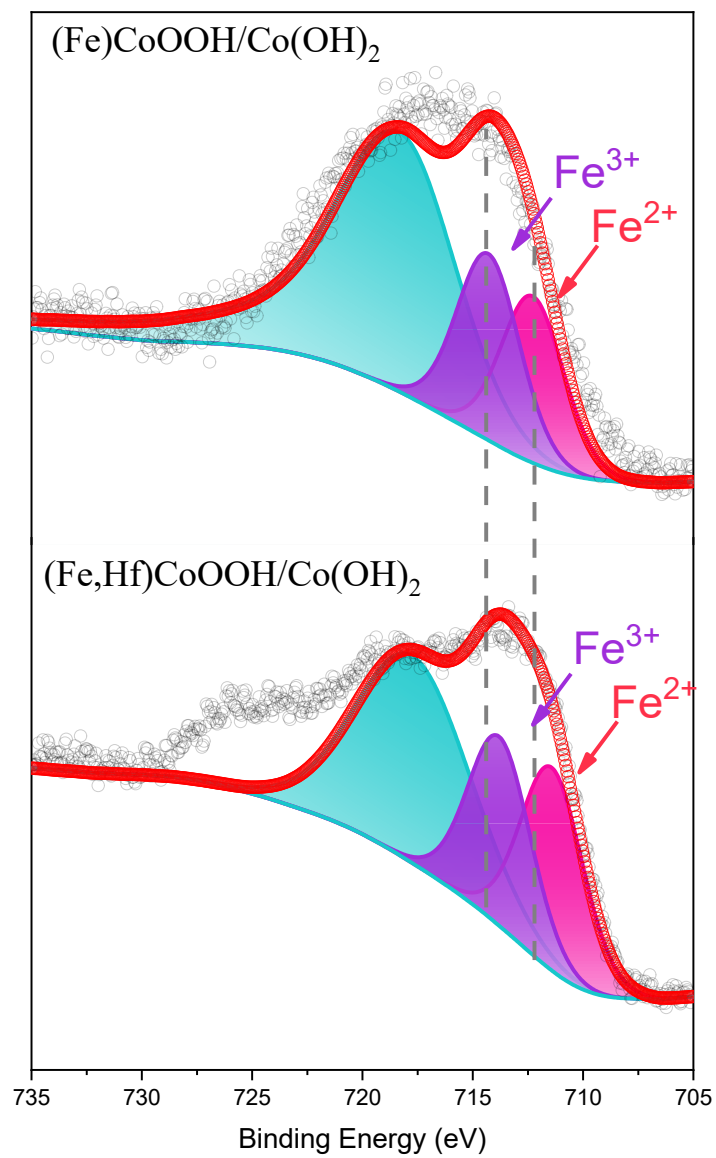

**Figure S6.** High-resolution XPS spectra of Fe 2p in the samples of (Fe)CoOOH/Co(OH)<sub>2</sub> and (Fe,Hf)CoOOH/Co(OH)<sub>2</sub>.

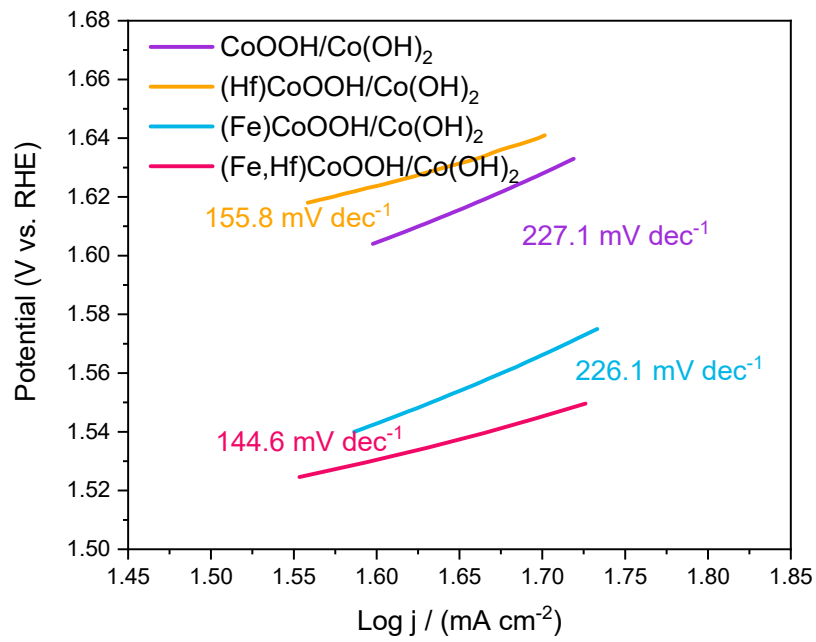

**Figure S7.** Tafel slop plot of all four catalysts at high potential.

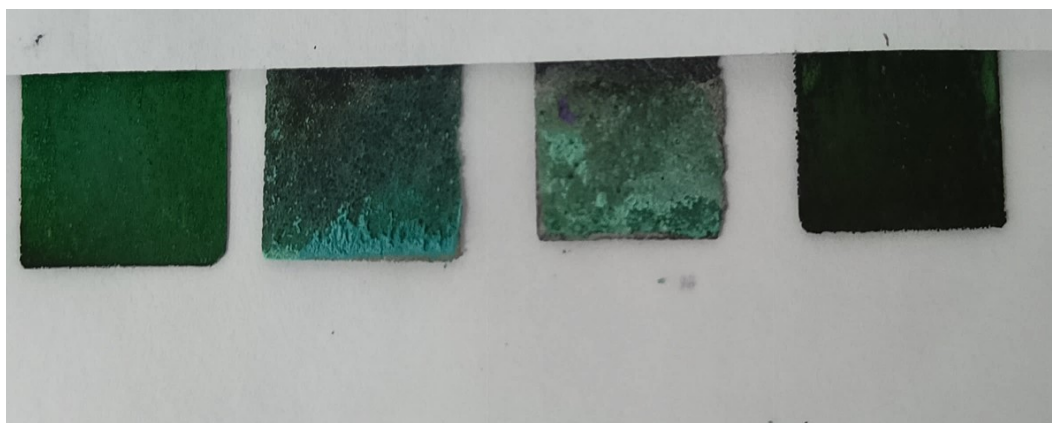

**Figure S8.** The optical photo of  $\text{CoOOH/Co(OH)}_2$ ,  $(\text{Hf})\text{CoOOH/Co(OH)}_2\text{-0.75}$ ,  $(\text{Hf})\text{CoOOH/Co(OH)}_2\text{-1.5}$ , and  $(\text{Hf})\text{CoOOH/Co(OH)}_2\text{-2.25}$  (from left to right respectively).

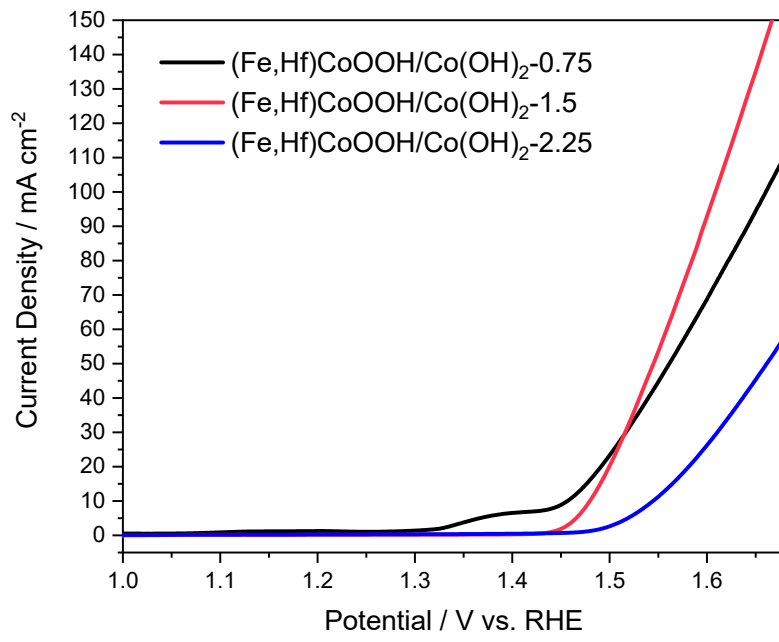

**Figure S9.** LSV plots of (Fe,Hf)CoOOH/Co(OH)<sub>2</sub> with different Hf<sup>4+</sup> dosages.

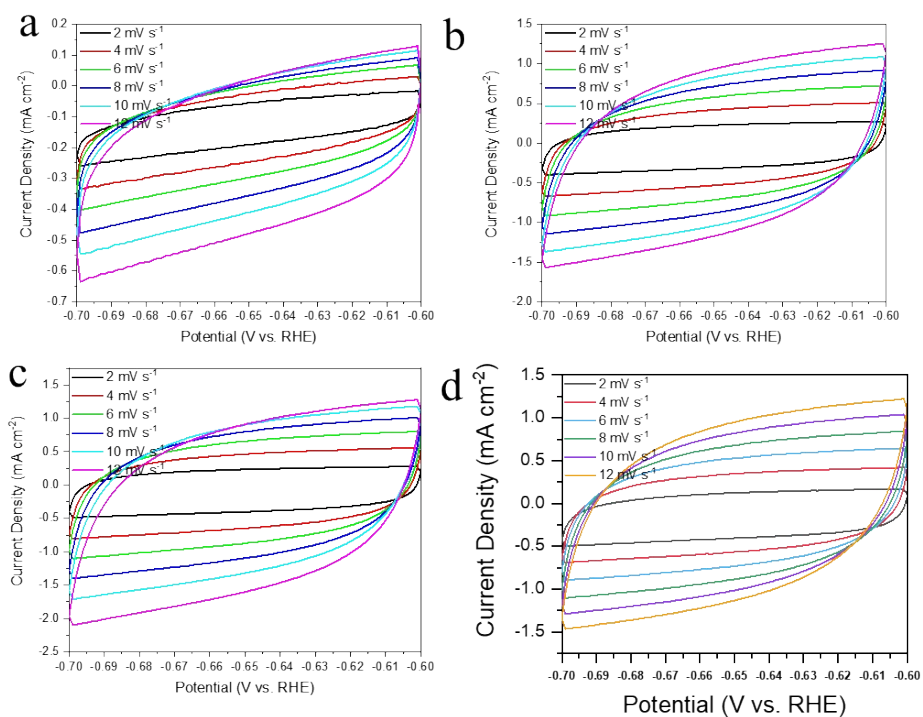

**Figure S10.** The CV curves from -0.7 to -0.6 V vs RHE of (a)CoOOH/Co(OH)<sub>2</sub>, (b)(Hf)CoOOH/Co(OH)<sub>2</sub>, (c)(Fe)CoOOH/Co(OH)<sub>2</sub>, and (d)(Fe,Hf)CoOOH/Co(OH)<sub>2</sub>



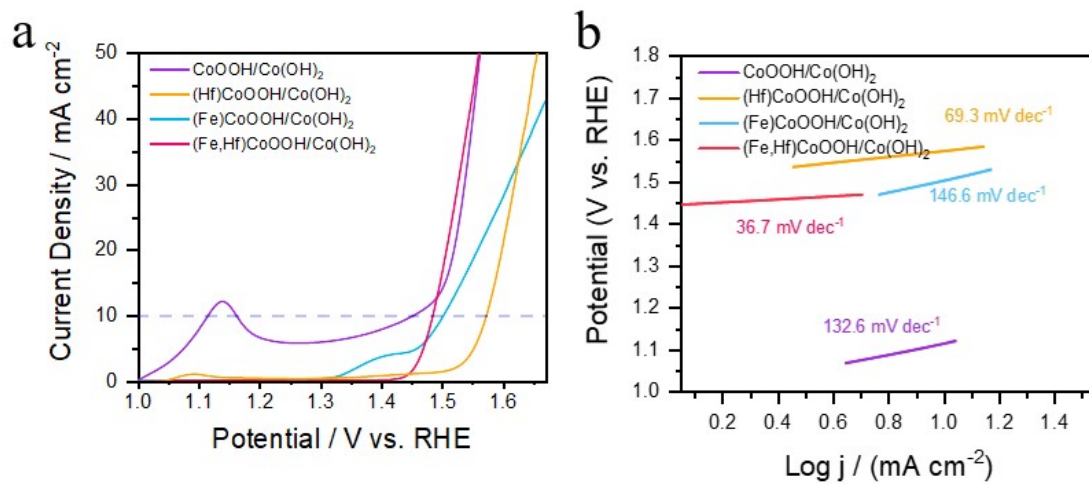

**Figure S11.** (a) Normalized LSV polarization curves and (b) corresponding Tafel slopes.

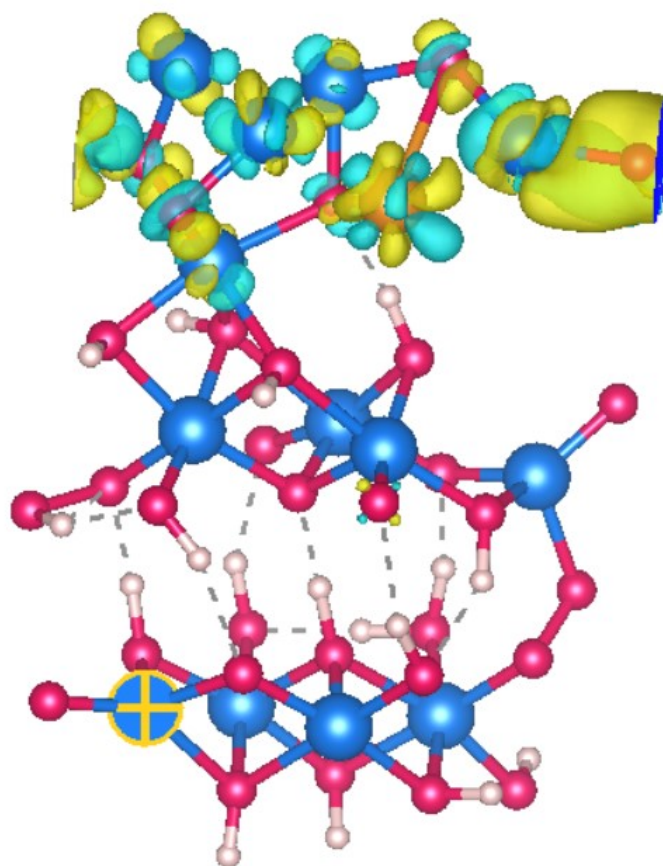

**Figure S12.** The differential charge densities of (Fe)CoOOH/Co(OH)<sub>2</sub> with O\*.

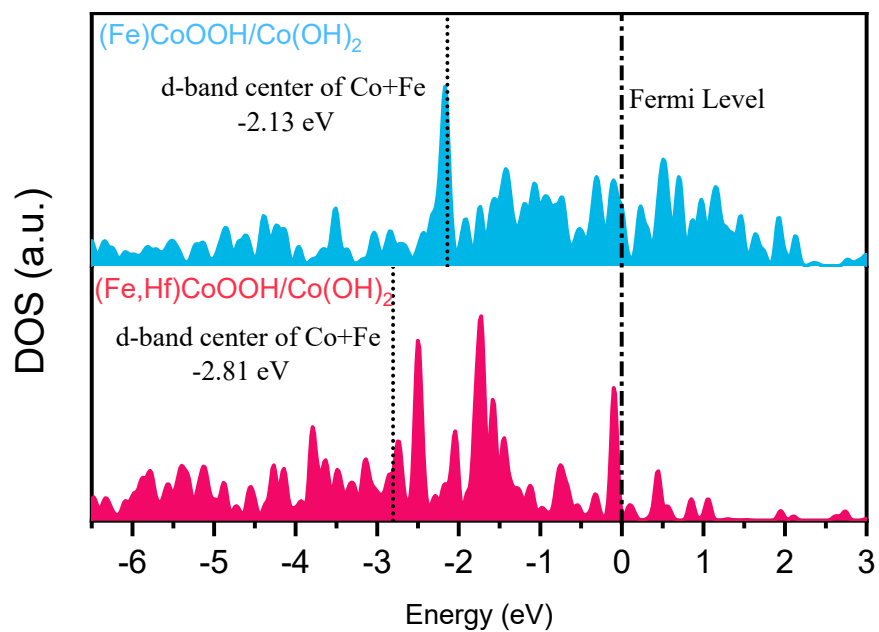

**Figure S13.** PDOS plots of Co+Fe sites in  $(\text{Fe,Hf})\text{CoOOH}/\text{Co}(\text{OH})_2$  and  $(\text{Fe})\text{CoOOH}/\text{Co}(\text{OH})_2$ .

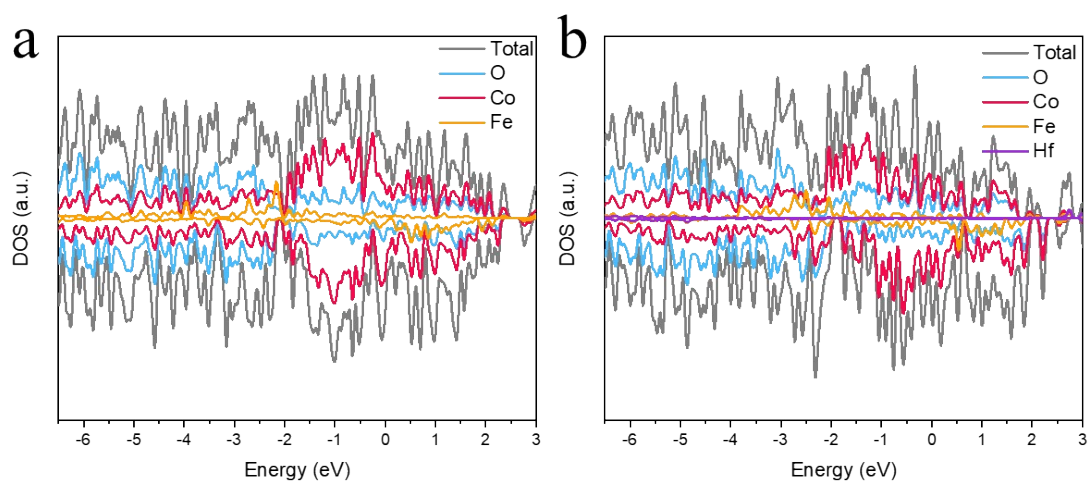

**Figure S14.** The projected density of states on (a) (Fe)CoOOH/Co(OH)<sub>2</sub> and (b) (Fe,Hf)CoOOH/Co(OH)<sub>2</sub> model.

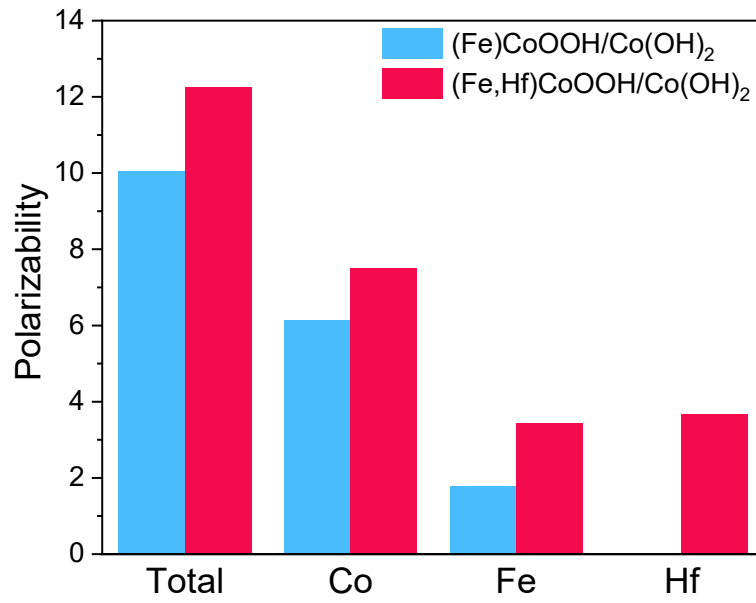

**Figure S15.** Spin polarizability of (Fe)CoOOH/Co(OH)<sub>2</sub> and (Fe,Hf)CoOOH/Co(OH)<sub>2</sub> (calculated with the energy interval of  $[E_f - 0.2 \text{ eV}, E_f]$ ).

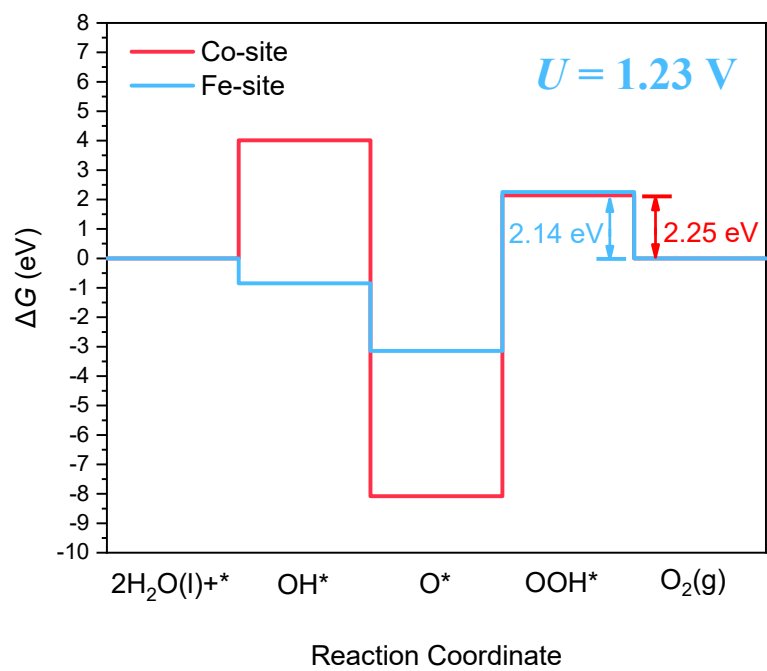

**Figure S16.** Gibbs free energy diagrams for (Fe)CoOOH/Co(OH)<sub>2</sub> at  $U=1.23$  V.

**Table S1.** Comparisons of OER performance for various electrocatalysts in 1.0 M KOH from other publications.

| Catalysts                                                                                  | Overpotential at<br>10 mA cm <sup>-2</sup><br>[mV] | Tafel slop<br>[mV dec <sup>-1</sup> ] | Ref.                                                    |
|--------------------------------------------------------------------------------------------|----------------------------------------------------|---------------------------------------|---------------------------------------------------------|
| (Hf,Fe)OOH/Co(OH) <sub>2</sub>                                                             | 250                                                | 37.6                                  | This work                                               |
| Co <sub>3</sub> Mo/Mo <sub>2</sub> C@NC                                                    | 282                                                | 59.3                                  | <i>Adv. Funct. Mater.</i> 2024,<br>34, 2314247          |
| Co-Mo-N-PHP                                                                                | 294                                                | 57                                    | <i>Appl. Catal. B: Environ.</i> ,<br>2019, 255, 117744  |
| P-NiO/NiCo <sub>2</sub> O <sub>4</sub>                                                     | 290                                                | 49.6                                  | <i>J. Alloys Compd.</i> 2022, 925,<br>166338            |
| FeOOH-CoMoO <sub>4</sub>                                                                   | 298                                                | 80.7                                  | <i>ACS Appl. Mater. Inter.</i><br>2021, 13, 17450-17458 |
| CoFe-P                                                                                     | 293                                                | —                                     | <i>Adv. Energy Mater.</i> 2022,<br>12, 2201141          |
| Li <sub>0.5</sub> Zn <sub>0.5</sub> Fe <sub>0.125</sub> Co <sub>1.875</sub> O <sub>4</sub> | 350                                                | —                                     | <i>Angew. Chem. Int. Ed.</i><br>2019, 58, 6042-6047     |
| γ-MnOOH/CoOOH                                                                              | 313                                                | 87                                    | <i>Chem Commun</i> , 2020, 56,<br>15387                 |
| CoP@CoOOH/CP                                                                               | 331                                                | 148                                   | <i>Small</i> 2022, 18, e2106012                         |
| CoCu@HNC                                                                                   | 289                                                | 131.8                                 | <i>CCS Chem.</i> 2024, 6, 1324-<br>1337                 |
| H-SCP                                                                                      | 291                                                | 38                                    | <i>J. Colloid Interface<br/>Sci.</i> 2023, 631,8-16     |
| Co <sub>3</sub> O <sub>4</sub> /Co-Fe                                                      | 297                                                | 61                                    | <i>Adv. Mater.</i> 2018, 30,<br>1801211                 |
| FeCoNi-LDH                                                                                 | 269                                                | 42.3                                  | <i>Adv. Energy Mater.</i> 2021,<br>11, 2102141          |
| Fe-Co <sub>x</sub> P                                                                       | 300                                                | 49                                    | <i>Chem. Eng. J.</i> ,2021,<br>409, 128227              |
| (Fe,Co)OOH/MI                                                                              | 230                                                | 73                                    | <i>Adv. Mater.</i> 2022, 34,<br>2200270                 |
